# Supplementary material
Source: MDPI journal article supplement (https://www.mdpi.com/search?q=foods-08-00430)
Supplement: s001 [file foods-08-00430-s001.pdf]

## Supplementary

**Table S1.** Values of bacterial growth ratio in bog bilberry juice after inoculating with three lactic acid bacteria strains in 14 days.

| Strain                | Time (Day)     |                |                |                |                |                |
|-----------------------|----------------|----------------|----------------|----------------|----------------|----------------|
|                       | 0              | 1              | 2              | 3              | 7              | 14             |
| <i>L. brevis</i>      | 1.000±0.004 Ad | 0.799±0.031 Ab | 0.648±0.004 Aa | 0.799±0.012 Ab | 0.860±0.025 Bc | 0.903±0.004 Bc |
| <i>L. acidophilus</i> | 1.000±0.003 Ad | 0.998±0.013 Bd | 0.951±0.013 Cc | 0.945±0.010 Cc | 0.821±0.006 Ab | 0.752±0.015 Aa |
| <i>O. oeni</i>        | 1.000±0.003 Ac | 0.869±0.018 Ab | 0.747±0.005 Ba | 0.860±0.009 Bb | 1.034±0.004 Cc | 1.022±0.022 Cc |

Data are mean ± standard deviation of triplicate tests; Different letters in lower case indicate significant differences with time, whereas different letters in upper case represent significant difference in juice inoculated with different strains at the same sampling interval at  $P<0.05$ .

**Table S2.** Content of reducing sugar, organic acid and pH in bog bilberry juice inoculated with three lactic acid bacteria strains in 14 days.

| Compound                      | Strain                | Time (Day)    |               |                |                |               |               |
|-------------------------------|-----------------------|---------------|---------------|----------------|----------------|---------------|---------------|
|                               |                       | 0             | 1             | 2              | 3              | 7             | 14            |
| <b><u>Reducing sugars</u></b> |                       |               |               |                |                |               |               |
| <b><u>(g/L)</u></b>           |                       |               |               |                |                |               |               |
| Glucose                       | <i>L. brevis</i>      | 11.49±0.12 Ac | 11.51±0.77 Ac | 11.05±0.07 Bc  | 9.45±0.15 Ab   | 8.54±0.49 Ab  | 4.82±0.02 Aa  |
|                               | <i>L. acidophilus</i> | 11.49±0.12 Ac | 10.7±0.62 Ac  | 10.76±0.64 ABc | 10.65±0.52 Bc  | 8.09±0.29 Ab  | 4.14±0.8 Aa   |
|                               | <i>O. oeni</i>        | 11.49±0.12 Ad | 10.16±0.16 Ac | 9.81±0.32 Ac   | 9.52±0.36 Ac   | 7.87±0.19 Ab  | 4.02±0.27 Aa  |
| Fructose                      | <i>L. brevis</i>      | 12.28±0.10 Ac | 11.13±0.5 Abc | 11.58±0.52 Abc | 11.05±0.73 Abc | 10.55±0.66 Ab | 9.1±0.2 Aa    |
|                               | <i>L. acidophilus</i> | 12.28±0.10 Ac | 11.56±0.5 Abc | 11.25±0.23 Abc | 11.49±0.42 Abc | 10.56±0.19 Ab | 7.97±0.8 Aa   |
|                               | <i>O. oeni</i>        | 12.28±0.10 Ad | 10.92±0.16 Ac | 10.66±0.29Ac   | 10.86±0.17 Ac  | 9.84±0.12 Ab  | 8.46±0.32 Aa  |
| Total                         | <i>L. brevis</i>      | 23.77±0.22 Ac | 22.64±0.68 Ac | 22.63±0.54 Bc  | 20.5±0.75 Ab   | 19.09±1.14 Ab | 13.92±0.22 Aa |
|                               | <i>L. acidophilus</i> | 23.77±0.22 Ac | 22.25±1.11 Ac | 22.01±0.56 Bc  | 22.14±0.94 Ac  | 18.65±0.48 Ab | 12.11±1.6 Aa  |
|                               | <i>O. oeni</i>        | 23.77±0.22 Ad | 21.08±0.32 Ac | 20.47±0.61 Ac  | 20.38±0.47 Ac  | 17.72±0.31 Ab | 12.48±0.48 Aa |
| <b><u>Organic acids</u></b>   |                       |               |               |                |                |               |               |
| <b><u>(g/L)</u></b>           |                       |               |               |                |                |               |               |
| Quinic acid                   | <i>L. brevis</i>      | 6.50±0.34 Aab | 5.86±0.30 Aa  | 6.93±0.04 Aab  | 7.29±0.63 Aab  | 7.48±0.22 Ab  | 6.21±0.31 Aab |
|                               | <i>L. acidophilus</i> | 6.50±0.34 Aa  | 7.70±1.06 Aa  | 7.63±0.17 Aa   | 7.44±0.11 Aa   | 6.90±0.12 Aa  | 6.35±0.39 Aa  |
|                               | <i>O. oeni</i>        | 6.50±0.34 Aa  | 5.96±0.69 Aa  | 7.03±0.31 Aa   | 6.61±0.18 Aa   | 7.04±0.24 Aa  | 5.90±0.30 Aa  |
| Malic acid                    | <i>L. brevis</i>      | 3.22±0.10 Aa  | 3.54±0.35 Aa  | 3.15±0.07 Aa   | 3.13±0.02 Ba   | 2.95±0.12 Aa  | 3.03±0.07 Aa  |
|                               | <i>L. acidophilus</i> | 3.22±0.10 Ac  | 2.64±0.07 Aa  | 2.96±0.05 Abc  | 2.97±0.05 Abc  | 2.83±0.07 Aab | 3.19±0.11 Ac  |
|                               | <i>O. oeni</i>        | 3.22±0.10 Aa  | 3.22±0.07 Ba  | 2.99±0.12 Aa   | 2.99±0.06 Aa   | 2.90±0.03 Aa  | 3.11±0.32 Aa  |
| Citric acid                   | <i>L. brevis</i>      | 2.94±0.11 Aa  | 2.74±0.13 Aa  | 2.75±0.04 Aa   | 2.93±0.02 Aa   | 2.95±0.15 Aa  | 2.91±0.19 Aa  |
|                               | <i>L. acidophilus</i> | 2.94±0.11 Aa  | 2.69±0.30 Aa  | 3.14±0.13 Ba   | 3.00±0.03 Aa   | 2.92±0.02 Aa  | 3.28±0.24 Aa  |
|                               | <i>O. oeni</i>        | 2.94±0.11 Ab  | 2.17±0.21 Aa  | 2.73±0.12 Ab   | 2.88±0.10 Ab   | 2.64±0.02 Ab  | 2.67±0.08 Ab  |
| Lactic acid                   | <i>L. brevis</i>      | nd            | nd            | nd             | nd             | nd            | nd            |
|                               | <i>L. acidophilus</i> | nd            | 0.31±0.04 Aa  | 0.40±0.07 Aa   | 0.50±0.03 Aab  | 0.77±0.14 Ac  | 0.75±0.08 Abc |
|                               | <i>O. oeni</i>        | nd            | nd            | nd             | nd             | nd            | nd            |

|                  |                       |               |               |               |                |               |                |
|------------------|-----------------------|---------------|---------------|---------------|----------------|---------------|----------------|
| Oxalic acid      | <i>L. brevis</i>      | 0.05±0.01 Aa  | 0.06±0.00 Aa  | 0.08±0.01 Aab | 0.09±0.02 Aab  | 0.12±0.03 Ab  | 0.05±0.01 Aa   |
|                  | <i>L. acidophilus</i> | 0.05±0.01 Aa  | tr            | 0.06±0.00 Aa  | 0.11±0.01 Ab   | 0.08±0.01 Aab | 0.06±0.03 Aa   |
|                  | <i>O. oeni</i>        | 0.05±0.01 Aa  | 0.04±0.00 Aa  | 0.10±0.01 Bb  | 0.10±0.01 Ab   | 0.11±0.02 Ab  | 0.05±0.02 Aa   |
| Shikimic acid    | <i>L. brevis</i>      | 0.04±0.00 Aa  | 0.04±0.01 Aa  | 0.03±0.00 Aa  | 0.03±0.00 Aa   | 0.04±0.00 Aa  | 0.03±0.00 Aa   |
|                  | <i>L. acidophilus</i> | 0.04±0.00 Ab  | 0.02±0.00 Aa  | 0.03±0.00 Aab | 0.03±0.00 Aab  | 0.03±0.00 Aab | 0.03±0.00 Aab  |
|                  | <i>O. oeni</i>        | 0.04±0.00 Aa  | 0.03±0.00 Aa  | 0.03±0.00 Aa  | 0.04±0.00 Aa   | 0.03±0.00 Aa  | 0.03±0.00 Aa   |
| Total            | <i>L. brevis</i>      | 12.74±0.98 Aa | 12.24±0.73 Aa | 12.93±0.12 Aa | 13.47±0.63 ABa | 13.53±0.44 Aa | 12.24±0.47 ABa |
|                  | <i>L. acidophilus</i> | 12.74±0.98 Aa | 13.37±0.79 Aa | 14.22±0.30 Ba | 14.06±0.18 Ba  | 13.54±0.30 Aa | 13.66±0.35 Ba  |
|                  | <i>O. oeni</i>        | 12.74±0.98 Aa | 11.43±0.83 Aa | 12.89±0.54 Aa | 12.62±0.20 Aa  | 12.73±0.27 Aa | 11.75±0.62 Aa  |
| <hr/>            |                       |               |               |               |                |               |                |
| <b><u>pH</u></b> |                       |               |               |               |                |               |                |
| pH               | <i>L. brevis</i>      | 2.66±0.00 Ab  | 2.67±0.01 Ab  | 2.67±0.01 Ab  | 2.66±0.01 Ab   | 2.65±0.02 Ab  | 2.62±0.00 Aa   |
|                  | <i>L. acidophilus</i> | 2.66±0.00 Abc | 2.68±0.01 Ac  | 2.68±0.00 Abc | 2.66±0.01 Abc  | 2.65±0.00 Ab  | 2.62±0.01 Aa   |
|                  | <i>O. oeni</i>        | 2.66±0.00 Ab  | 2.70±0.00 Acd | 2.70±0.01 Bd  | 2.68±0.01 Abcd | 2.67±0.02 Abc | 2.62±0.01 Aa   |

Data are mean ± standard deviation of triplicate tests “nd” represents “not detected”; Different letters in lower case indicate significant differences with time, whereas different letters in upper case represent significant difference in juice inoculated with different strains at the same sampling interval at  $P < 0.05$ .

**Table S3.** Content of amino acids, ammonium ion, and biogenic amines in bog bilberry juice inoculated with three lactic acid bacteria strains in 14 days.

| Compound<br>(mg/L)        | Strain                | Time (Day)    |                |               |                |               |               |
|---------------------------|-----------------------|---------------|----------------|---------------|----------------|---------------|---------------|
|                           |                       | 0             | 1              | 2             | 3              | 7             | 14            |
| <b><i>Amino acids</i></b> |                       |               |                |               |                |               |               |
| Valine                    | <i>L. brevis</i>      | 14.26±0.31 Ac | 13.95±0.29 Ac  | 18.48±0.34 Bd | 14.88±1.36 Ac  | 4.58±0.63 Ab  | 0.10±0.22 Aa  |
|                           | <i>L. acidophilus</i> | 14.26±0.31 Ac | 16.78±1.21 Ad  | 20.07±0.52 Ce | 19.79±0.48 Be  | 5.82±0.72 Ab  | 0.77±0.00 Ba  |
|                           | <i>O. oeni</i>        | 14.26±0.31 Ab | 14.38±0.65 Ab  | 14.68±0.28 Ab | 18.25±1.36 ABc | 4.39±0.60 Aa  | tr            |
| Asparaginate              | <i>L. brevis</i>      | 10.23±0.93 Ab | 7.35±0.42 Ab   | 1.91±2.29 Aa  | 0.92±0.11 Aa   | 1.44±0.25 Aa  | 0.02±0.04 Aa  |
|                           | <i>L. acidophilus</i> | 10.23±0.93 Ac | 7.75±0.27 Abc  | 10.20±0.77 Bc | 6.03±0.71 Bb   | 1.90±2.28 Aa  | 0.25±0.10 Aa  |
|                           | <i>O. oeni</i>        | 10.23±0.93 Ab | 8.87±0.92 Ab   | 8.78±0.90 Bb  | 0.92±0.00 Aa   | 1.23±0.06 Aa  | 0.61±0.07 Ba  |
| Glutamine                 | <i>L. brevis</i>      | 6.28±0.08 Ab  | 5.80±0.32 Aab  | 8.96±4.50 Aab | 3.16±3.05 Aab  | 0.78±0.34 Aab | 0.59±0.07 Aa  |
|                           | <i>L. acidophilus</i> | 6.28±0.08 Aab | 11.69±0.67 Bcd | 13.04±0.90 Ad | 9.00±1.28 Abc  | 4.73±0.33 Ba  | 3.82±1.34 Ba  |
|                           | <i>O. oeni</i>        | 6.28±0.08 Ac  | 5.93±0.26 Ac   | 5.80±0.21 Ac  | 4.30±0.00 Ab   | 0.40±0.10 Aa  | 0.33±0.03 Aa  |
| Arginine                  | <i>L. brevis</i>      | 6.61±0.19 Ad  | 2.54±0.25 Bc   | 1.73±0.98 Ac  | 0.64±0.03 Ab   | 0.48±0.14 Aa  | 0.16±0.01 Aa  |
|                           | <i>L. acidophilus</i> | 6.61±0.19 Ad  | 6.10±0.16 Cc   | 5.35±0.43 Bc  | 3.94±0.90 Bb   | 0.29±0.00 Aa  | 0.38±0.03 Ba  |
|                           | <i>O. oeni</i>        | 6.61±0.19 Ac  | 1.37±0.04 Ab   | 1.02±0.08 Ab  | 0.74±0.34 Aa   | 0.26±0.05 Aa  | 0.21±0.01 Aa  |
| Serine                    | <i>L. brevis</i>      | 3.80±0.71 Abc | 4.26±0.14 Bc   | 4.61±0.20 Cc  | 2.90±0.53 Bb   | 0.54±0.03 Ba  | 0.43±0.03 ABa |
|                           | <i>L. acidophilus</i> | 3.80±0.71 Acd | 4.52±0.17 Bd   | 3.39±0.03 Bc  | 1.50±0.08 Ab   | 0.23±0.07 Aa  | 1.01±0.33 Bb  |
|                           | <i>O. oeni</i>        | 3.80±0.71 Ad  | 2.80±0.06 Ac   | 2.61±0.19 Ac  | 1.49±0.00 Ab   | tr            | 0.18±0.05 Aa  |
| Phenylalanine             | <i>L. brevis</i>      | 2.21±0.06 Ab  | 0.74±0.81 Aa   | tr            | tr             | tr            | tr            |
|                           | <i>L. acidophilus</i> | 2.21±0.06 Ab  | 1.45±0.96 Aab  | 0.30±0.09 Aab | tr             | 0.01±0.08 Aa  | 2.00±0.91 Ab  |
|                           | <i>O. oeni</i>        | 2.21±0.06 Aab | 4.80±2.34 Ab   | 1.98±0.01 Bab | 0.65±0.30 Aa   | 1.35±0.03 Bab | tr            |
| Tryptophan                | <i>L. brevis</i>      | 1.23±0.43 Ab  | 0.50±0.35 Aa   | tr            | 1.06±0.44 Bb   | tr            | tr            |
|                           | <i>L. acidophilus</i> | 1.23±0.43 Ab  | tr             | tr            | tr             | tr            | 0.05±0.07 Aa  |
|                           | <i>O. oeni</i>        | 1.23±0.43 Abc | 2.23±0.34 Bd   | 1.84±0.36 Acd | 0.37±0.27 ABab | 0.40±0.09 Aab | tr            |
| Glycine                   | <i>L. brevis</i>      | 3.28±0.03 Ab  | 2.97±0.06 ABb  | 3.02±0.06 ABb | 2.79±0.14 Ab   | 0.74±0.31 Aa  | 0.50±0.00 Ba  |
|                           | <i>L. acidophilus</i> | 3.28±0.03 Ac  | 3.19±0.04 Bc   | 3.21±0.07 Bc  | 2.51±0.37 Abc  | 1.65±0.69 Ab  | 0.37±0.01 Aa  |
|                           | <i>O. oeni</i>        | 3.28±0.03 Ad  | 2.82±0.10 Ac   | 2.75±0.12 Ac  | 1.99±0.05 Ab   | 0.42±0.01 Aa  | 0.32±0.00 Aa  |

|                     |                       |               |               |               |               |               |               |
|---------------------|-----------------------|---------------|---------------|---------------|---------------|---------------|---------------|
| Histidine           | <i>L. brevis</i>      | 1.75±0.03 Abc | 1.49±0.09 Ab  | 2.38±0.54 Bc  | 1.38±0.11 Bb  | 0.41±0.09 Aa  | 0.13±0.03 Aa  |
|                     | <i>L. acidophilus</i> | 1.75±0.03 Ad  | 1.43±0.10 Ad  | 0.87±0.04 Ac  | 0.70±0.10 Abc | 0.40±0.19 Aab | 0.31±0.07 Ba  |
|                     | <i>O. oeni</i>        | 1.75±0.03 Ae  | 1.48±0.03 Ad  | 1.04±0.01 Ac  | 0.71±0.03 Ab  | 0.14±0.01 Aa  | 0.16±0.00 Aa  |
| Lysine              | <i>L. brevis</i>      | 4.00±0.00 Ac  | 3.09±0.41 Abc | 3.54±0.21 Ac  | 1.99±0.87 Ab  | 0.13±0.13 Aa  | 0.02±0.01 Aa  |
|                     | <i>L. acidophilus</i> | 4.00±0.00 Ab  | 3.95±0.10 Ab  | 3.75±0.31 Ab  | 2.38±0.81 Aab | 1.21±1.25 Aa  | 2.06±1.03 Aab |
|                     | <i>O. oeni</i>        | 4.00±0.00 Ac  | 2.70±1.17 Abc | 3.38±0.35 Abc | 1.61±0.98 Aab | 0.16±0.01 Aa  | 0.07±0.03 Aa  |
| Methionine          | <i>L. brevis</i>      | 3.93±1.75 Ab  | 3.67±0.17 Ab  | 3.33±0.49 Ab  | 1.68±0.03 Aa  | 0.79±0.36 Aa  | 1.41±0.08 Aa  |
|                     | <i>L. acidophilus</i> | 3.93±1.75 Ab  | 3.44±0.34 Ab  | 4.13±0.49 Ab  | 2.78±0.06 Ba  | 2.41±0.10 Ba  | 1.12±0.70 Aa  |
|                     | <i>O. oeni</i>        | 3.93±1.75 Ac  | 3.20±0.04 Abc | 3.01±0.22 Abc | 2.98±0.27 Bbc | 2.22±0.30 Bab | 1.48±0.13 Aa  |
| Ornithine           | <i>L. brevis</i>      | 0.38±0.00 Aa  | 2.19±0.21 Bb  | 2.56±0.20 Bb  | 1.95±0.22 Bb  | 0.45±0.22 Aa  | 0.21±0.00 ABa |
|                     | <i>L. acidophilus</i> | 0.38±0.00 Aab | 0.35±0.01 Aab | 0.44±0.05 Ab  | 0.41±0.02 Ab  | 0.20±0.10 Aa  | 0.35±0.07 Bab |
|                     | <i>O. oeni</i>        | 0.38±0.00 Aa  | 3.79±0.43 Cb  | 4.10±0.12 Cb  | 3.99±0.10 Cb  | 0.25±0.00 Aa  | 0.16±0.01 Aa  |
| Leucine             | <i>L. brevis</i>      | 2.14±0.18 Aab | 3.62±1.06 Abc | 4.63±0.29 Ac  | 3.46±0.70 Abc | 1.60±0.53 Aab | 0.16±0.00 Aa  |
|                     | <i>L. acidophilus</i> | 2.14±0.18 Aab | 2.97±0.86 Ab  | 3.79±0.30 Ab  | 3.31±0.72 Ab  | 2.27±0.91 Aab | 0.38±0.08 Ba  |
|                     | <i>O. oeni</i>        | 2.14±0.18 Ab  | 2.09±0.01 Ab  | 1.74±0.19 Bb  | 1.66±0.83 Ab  | 0.41±0.03 Aa  | 0.16±0.00 Aa  |
| γ-Aminobutyric acid | <i>L. brevis</i>      | 3.09±0.05 Ad  | 2.92±0.04 Ac  | 3.44±0.03 ABd | 2.70±0.41 Ac  | 0.63±0.04 Ab  | 0.27±0.06 Aa  |
|                     | <i>L. acidophilus</i> | 3.09±0.05 Ac  | 3.16±0.10 Ac  | 3.53±0.08 Bd  | 3.07±0.15 Ac  | 0.61±0.03 Aa  | 1.19±0.14 Bb  |
|                     | <i>O. oeni</i>        | 3.09±0.05 Ac  | 3.06±0.12 Ac  | 3.23±0.11 Ac  | 3.05±0.19 Ac  | 0.62±0.05 Ab  | 0.39±0.02 Aa  |
| Isoleucine          | <i>L. brevis</i>      | 0.28±0.01 Aa  | 1.10±0.04 Aab | 1.09±0.13 Bab | 0.18±0.20 Aa  | 1.16±0.77 Aab | 2.48±0.64 Bb  |
|                     | <i>L. acidophilus</i> | 0.28±0.01 Aa  | 1.33±0.14 Aab | 1.39±0.17 Bb  | 0.86±0.31 Aab | 0.52±0.45 Aab | 0.61±0.40 Aab |
|                     | <i>O. oeni</i>        | 0.28±0.01 Aab | 0.77±0.46 Ab  | 0.26±0.02 Aab | 0.25±0.26 Aab | 0.12±0.01 Aa  | tr            |
| Tyrosine            | <i>L. brevis</i>      | 2.79±0.03 Abc | 2.28±0.25 Bb  | 3.45±0.38 Bc  | 2.58±0.43 Abc | 2.43±0.23 Ab  | 1.30±0.29 Ba  |
|                     | <i>L. acidophilus</i> | 2.79±0.03 Ab  | 0.57±0.53 Aa  | 0.86±0.82 Aa  | 0.42±0.04 Aa  | 0.34±0.30 Aa  | 0.56±0.17 Aa  |
|                     | <i>O. oeni</i>        | 2.79±0.03 Ac  | 1.75±0.15 ABa | 1.70±0.04 ABa | 1.39±0.12 Ba  | 1.55±0.26 Aa  | 2.65±0.23 Cb  |
| Cysteine            | <i>L. brevis</i>      | 2.20±0.15 Ab  | 2.31±0.07 Bb  | 2.39±0.32 Ab  | 2.20±0.25 Ab  | 0.71±0.52 Aa  | 1.86±0.05 Ab  |
|                     | <i>L. acidophilus</i> | 2.20±0.15 Aab | 2.35±0.26 Bab | 2.54±0.17 Ab  | 2.02±0.03 Aa  | 2.01±0.02 Ba  | 2.11±0.01 Aab |
|                     | <i>O. oeni</i>        | 2.20±0.15 Ab  | 0.80±0.61 Aa  | 2.08±0.00 Ab  | 2.25±0.09 Ab  | 2.16±0.02 Bb  | 1.88±0.17 Ab  |
| Proline             | <i>L. brevis</i>      | 1.41±0.24 Ab  | 0.50±0.00 Aa  | 0.79±0.13 Aa  | 1.32±0.08 Ab  | 1.44±1.44 Cb  | tr            |

|                               |                       |                |                |               |                |               |               |
|-------------------------------|-----------------------|----------------|----------------|---------------|----------------|---------------|---------------|
|                               | <i>L. acidophilus</i> | 1.41±0.24 Aa   | 1.14±0.16 Ba   | 1.92±0.06 Cb  | 1.30±0.02 Aa   | 1.21±0.03 Ba  | tr            |
|                               | <i>O. oeni</i>        | 1.41±0.24 Ac   | 1.25±0.02 Bbc  | 1.21±0.03 Bbc | 1.23±0.18 Abc  | 1.03±0.05 Aab | 0.81±0.05 Aa  |
| β-Alanine                     | <i>L. brevis</i>      | 0.85±0.01 Ac   | 0.89±0.06 Ac   | 1.00±0.02 Bd  | 0.44±0.01 Ab   | 0.06±0.01 Aa  | 0.12±0.03 Ba  |
|                               | <i>L. acidophilus</i> | 0.85±0.01 Ac   | 0.88±0.02 Ac   | 0.83±0.05 Ac  | 0.47±0.21 Ab   | 0.10±0.01 Aa  | 0.08±0.01 ABa |
|                               | <i>O. oeni</i>        | 0.85±0.01 Ab   | 0.83±0.04 Ab   | 0.71±0.05 Ab  | 0.06±0.06 Aa   | 0.11±0.04 Aa  | 0.04±0.01 Aa  |
| Threonine                     | <i>L. brevis</i>      | 1.33±0.02 Ac   | 1.24±0.00 Ac   | 1.33±0.03 Abc | 1.17±0.07 Ab   | 0.87±0.03 Aa  | 0.80±0.00 Aa  |
|                               | <i>L. acidophilus</i> | 1.33±0.02 Ac   | 1.30±0.00 Bc   | 1.33±0.02 Ac  | 1.22±0.03 Ab   | 0.88±0.00 Aa  | 0.89±0.01 Ba  |
|                               | <i>O. oeni</i>        | 1.33±0.02 Ac   | 1.27±0.02 ABbc | 1.27±0.01 Abc | 1.21±0.05 Ab   | 0.86±0.01 Aa  | 0.89±0.00 Ba  |
| Aspartic acid                 | <i>L. brevis</i>      | 0.52±0.00 Abc  | 0.58±0.02 Bcd  | 0.64±0.01 Bd  | 0.46±0.03 Ab   | 0.02±0.03 Aa  | 0.06±0.01 Aa  |
|                               | <i>L. acidophilus</i> | 0.52±0.00 Ab   | 0.72±0.02 Cc   | 0.76±0.03 Cc  | 0.66±0.03 Bc   | 0.48±0.09 Cb  | 0.04±0.02 Aa  |
|                               | <i>O. oeni</i>        | 0.52±0.00 Ac   | 0.40±0.03 Abc  | 0.39±0.03 Ab  | 0.52±0.07 ABc  | 0.22±0.03 Ba  | tr            |
| Glutamic acid                 | <i>L. brevis</i>      | 0.65±0.03 Ac   | 0.50±0.05 Ab   | 0.65±0.05 Ac  | 0.67±0.05 Ac   | 0.51±0.02 ABb | 0.15±0.02 Aa  |
|                               | <i>L. acidophilus</i> | 0.65±0.03 Ac   | 0.61±0.05 ABc  | 0.71±0.04 Ac  | 0.67±0.04 Ac   | 0.47±0.04 Ab  | 0.20±0.03 Aa  |
|                               | <i>O. oeni</i>        | 0.65±0.03 Aabc | 0.66±0.02 Bbc  | 0.69±0.02 Ac  | 0.65±0.00 Aabc | 0.61±0.03 Bab | 0.58±0.03 Ba  |
| α-Alanine                     | <i>L. brevis</i>      | 0.06±0.01 Ab   | 0.07±0.00B Ac  | 0.05±0.00 Ab  | 0.05±0.00 Ab   | 0.06±0.00 Bb  | 0.03±0.01 Aa  |
|                               | <i>L. acidophilus</i> | 0.06±0.01 Abc  | 0.07±0.01 Bc   | 0.04±0.01 Aab | 0.04±0.00 Aab  | 0.03±0.00 Aa  | 0.03±0.00 Aa  |
|                               | <i>O. oeni</i>        | 0.06±0.01 Aa   | 0.03±0.01 Aa   | 0.06±0.01 Aa  | 0.04±0.02 Aa   | 0.04±0.01 AB  | 0.04±0.01 Aa  |
| Total                         | <i>L. brevis</i>      | 73.28±3.32 Ad  | 64.56±4.64 Acd | 69.98±9.86 Ad | 48.58±6.16 Ac  | 19.83±5.53 Ab | 10.80±1.45 Aa |
|                               | <i>L. acidophilus</i> | 73.28±3.32 Abc | 73.47±5.44 Abc | 82.45±4.76 Bc | 63.08±5.55 Bb  | 27.77±5.81 Ba | 18.58±5.19 Aa |
|                               | <i>O. oeni</i>        | 73.28±3.32 Ad  | 66.47±5.93 Ad  | 64.33±2.86 Ad | 50.31±5.26 Ac  | 18.95±1.50 Ab | 10.96±0.73 Aa |
| <b><u>Ammonium amine</u></b>  |                       |                |                |               |                |               |               |
| NH <sub>4</sub> <sup>+</sup>  | <i>L. brevis</i>      | 2.08±1.76 Ab   | 3.04±0.07 Ac   | 3.14±0.02 Ac  | 1.18±0.59 Aa   | tr            | tr            |
|                               | <i>L. acidophilus</i> | 2.08±1.76 Abc  | 3.23±0.73 Ac   | 3.03±0.85 Ac  | 1.43±0.46 Abc  | 0.30±1.03 Aab | tr            |
|                               | <i>O. oeni</i>        | 2.08±1.76 Ab   | 3.73±0.18 Ac   | 4.00±0.58 Ac  | 1.85±0.77 Ab   | tr            | 0.11±0.05 Aa  |
| <b><u>Biogenic amines</u></b> |                       |                |                |               |                |               |               |
| Tyramine                      | <i>L. brevis</i>      | 0.22±0.01 Ab   | 0.18±0.01 Aa   | 0.19±0.01 Aa  | 0.18±0.01 Aa   | 0.16±0.01 Aa  | 0.16±0.01 Aa  |
|                               | <i>L. acidophilus</i> | 0.22±0.01 Ab   | 0.19±0.01 Ab   | 0.21±0.00 Bb  | 0.20±0.01 Ab   | 0.14±0.03 Aa  | 0.17±0.00 Aab |
|                               | <i>O. oeni</i>        | 0.22±0.01 Ac   | 0.20±0.01 Aabc | 0.21±0.00 Bbc | 0.18±0.01 Aabc | 0.15±0.00 Aab | 0.15±0.03 Aa  |

|                |                       |               |               |                |                |               |               |
|----------------|-----------------------|---------------|---------------|----------------|----------------|---------------|---------------|
| Spermine       | <i>L. brevis</i>      | 0.13±0.04 Aab | 0.11±0.01 Ab  | 0.11±0.01 Aab  | 0.10±0.01 ABab | 0.06±0.02 Aa  | 0.07±0.00 Bab |
|                | <i>L. acidophilus</i> | 0.13±0.04 Aa  | 0.10±0.01 Aa  | 0.16±0.01 Bb   | 0.11±0.01 Ba   | 0.08±0.02 Aa  | 0.09±0.00 Ca  |
|                | <i>O. oeni</i>        | 0.13±0.04 Aa  | 0.20±0.05 Ab  | 0.08±0.01 Aa   | 0.08±0.01 Aa   | 0.07±0.00 Aa  | 0.06±0.00 Aa  |
| Spermidine     | <i>L. brevis</i>      | 0.20±0.02 Ac  | 0.06±0.00 Aa  | 0.07±0.03 ABa  | 0.15±0.02 Bbc  | 0.09±0.04 Aab | 0.04±0.02 ABa |
|                | <i>L. acidophilus</i> | 0.20±0.02 Ab  | 0.19±0.01 Bb  | 0.05±0.02 Aa   | 0.08±0.02 Aa   | 0.08±0.03 Aa  | 0.08±0.03 Ba  |
|                | <i>O. oeni</i>        | 0.20±0.02 Ad  | 0.19±0.01 Bcd | 0.14±0.02 bc   | 0.10±0.02 ABab | 0.07±0.02 Aa  | tr            |
| Cadaverine     | <i>L. brevis</i>      | 1.13±0.02 Ab  | 1.02±0.09 Ab  | 1.07±0.02 Ab   | 0.97±0.14 Ab   | 0.08±0.02 Aa  | 0.01±0.01 Aa  |
|                | <i>L. acidophilus</i> | 1.13±0.02 Ac  | 1.07±0.01 Abc | 1.10±0.03 Abc  | 1.00±0.07 Ab   | 0.08±0.02 Aa  | 0.05±0.01 Ba  |
|                | <i>O. oeni</i>        | 1.13±0.02 Ac  | 1.08±0.01 Ac  | 1.06±0.01 Abc  | 1.00±0.04 Ab   | 0.03±0.00 Aa  | 0.09±0.01 Ba  |
| Putrescine     | <i>L. brevis</i>      | 1.73±0.01 Ab  | 1.54±0.02 Ab  | 1.65±0.08 Ab   | 1.32±0.33 Ab   | 0.08±0.00 Aa  | 0.29±0.04 Ba  |
|                | <i>L. acidophilus</i> | 1.73±0.01 Ac  | 1.75±0.04 Bc  | 1.78±0.05 Ac   | 1.47±0.17 Ab   | 0.10±0.01 Aa  | 0.12±0.02 Aa  |
|                | <i>O. oeni</i>        | 1.73±0.01 Ac  | 1.56±0.07 Abc | 1.61±0.04 Abc  | 1.43±0.19 Ab   | 0.08±0.00 Aa  | 0.08±0.00 Aa  |
| Phenethylamine | <i>L. brevis</i>      | 0.99±0.01 Ab  | 0.89±0.01 Ab  | 1.00±0.03 ABb  | 0.93±0.10 Ab   | 0.11±0.01 Aa  | 0.10±0.02 Aa  |
|                | <i>L. acidophilus</i> | 0.99±0.01 Ab  | 0.99±0.03 Ab  | 1.03±0.03 Bb   | 0.95±0.05 Ab   | 0.10±0.01 Aa  | 0.08±0.01 Aa  |
|                | <i>O. oeni</i>        | 0.99±0.01 Ac  | 0.90±0.04 Ab  | 0.93±0.01 Abc  | 0.92±0.01 Abc  | 0.09±0.01 Aa  | 0.01±0.00 Aa  |
| Histamine      | <i>L. brevis</i>      | 3.81±0.21 Aa  | 3.39±0.55 Aa  | 4.29±0.17 ABab | 4.24±0.66 ABab | 4.53±0.41 Aab | 5.54±0.01 Bb  |
|                | <i>L. acidophilus</i> | 3.81±0.21 Aa  | 5.42±0.42 Bab | 6.24±0.31 Bbc  | 5.23±0.17 Bab  | 6.91±0.47 Bbc | 7.94±1.16 Cc  |
|                | <i>O. oeni</i>        | 3.81±0.21 ABb | 3.87±0.67 Ab  | 3.69±0.61 Ab   | 3.70±0.17 Ab   | 4.83±0.18 Ab  | 0.79±0.17 Aa  |
| Total          | <i>L. brevis</i>      | 8.21±0.32 Ab  | 7.19±0.69 Aab | 8.38±0.35 Ab   | 7.89±1.27 ABab | 5.11±0.51 Aa  | 6.21±0.11 Ba  |
|                | <i>L. acidophilus</i> | 8.21±0.32 Aab | 9.71±0.53 Bb  | 10.57±0.45 Bb  | 9.04±0.50 Bab  | 7.49±0.59 Ba  | 8.53±1.23 Cab |
|                | <i>O. oeni</i>        | 8.21±0.32 Ac  | 8.00±0.86 ABc | 7.72±0.70 Ac   | 7.41±0.45 Ac   | 5.32±0.21 Ab  | 1.18±0.21 Aa  |

Data are mean ± standard deviation of triplicate tests; “tr” represents “trace amount”; Different letters in lower case indicate significant differences with time, whereas different letters in upper case represent significant difference in juice inoculated with different strains at the same sampling interval at  $P < 0.05$ .

**Table S4.** Content of phenolic acids, flavonols, flavanols, and anthocyanins in bog bilberry juice inoculated with three lactic acid bacteria strains in 14 days.

| Compound<br>(mg/L)           | Strain                | Time (Day)    |                |                 |                |               |                |
|------------------------------|-----------------------|---------------|----------------|-----------------|----------------|---------------|----------------|
|                              |                       | 0             | 1              | 2               | 3              | 7             | 14             |
| <b><i>Phenolic acids</i></b> |                       |               |                |                 |                |               |                |
| Protocatechuic acid          | <i>L. brevis</i>      | 28.37±1.84 Ab | 25.38±1.09 Bab | 23.54±0.31 Bab  | 23.21±0.48 Ba  | 23.22±1.36 Ba | 23.95±0.18 Cab |
|                              | <i>L. acidophilus</i> | 28.37±1.84 Ab | 9.47±0.25 Aa   | 8.73±0.46 Aa    | 8.15±0.46 Aa   | 7.02±0.51 Aa  | 7.58±0.27 Aa   |
|                              | <i>O. oeni</i>        | 28.37±1.84 Ab | 22.86±0.72 Ba  | 22.46±0.02 Ba   | 22.16±0.31 Ba  | 22.05±0.23 Ba | 22.11±0.29 Ba  |
| Chlorogenic acid             | <i>L. brevis</i>      | 24.30±0.13 Ac | 23.57±1.52 Abc | 21.75±0.51 Aabc | 20.09±0.29 Aab | 18.96±0.76 Aa | 19.41±0.25 Aa  |
|                              | <i>L. acidophilus</i> | 24.30±0.13 Ac | 23.69±0.35 Ac  | 23.60±0.44 Ac   | 21.57±0.05 Bb  | 20.03±0.18 Aa | 20.99±0.16 Bab |
|                              | <i>O. oeni</i>        | 24.30±0.13 Ac | 21.88±0.03 Ab  | 22.08±0.89 Ab   | 19.74±0.04 Aa  | 19.09±0.12 Aa | 18.75±0.03 Aa  |
| Gallic acid                  | <i>L. brevis</i>      | 11.71±0.49 Ab | 9.75±0.46 Bab  | 8.76±0.16 Ca    | 7.80±0.43 Ba   | 7.83±0.54 Aa  | 8.19±0.51 Ba   |
|                              | <i>L. acidophilus</i> | 11.71±0.49 Ab | 7.55±0.07 Aa   | 6.74±0.06 Aa    | 6.32±0.25 Aa   | 6.25±0.49 Aa  | 6.56±0.32 Aa   |
|                              | <i>O. oeni</i>        | 11.71±0.49 Ab | 7.53±0.07 Aa   | 7.60±0.18 Ba    | 7.04±0.02 ABa  | 7.24±0.18 Aa  | 7.67±0.06 ABa  |
| Caffeic acid                 | <i>L. brevis</i>      | 3.68±0.36 Ab  | 2.55±0.33 Bab  | 2.32±0.20 Ba    | 2.36±0.23 Ba   | 2.22±0.29 Ba  | 1.89±0.11 Ba   |
|                              | <i>L. acidophilus</i> | 3.68±0.36 Ac  | 1.12±0.09 Ab   | 0.79±0.01 Aab   | 0.75±0.12 Aab  | 0.37±0.03 Aab | 0.16±0.01 Aa   |
|                              | <i>O. oeni</i>        | 3.68±0.36 Ab  | 2.87±0.13 Ba   | 2.69±0.03 Aa    | 2.63±0.04 Ba   | 2.39±0.05 Ba  | 2.13±0.09 Ba   |
| 4-Hydroxy-cinnamic acid      | <i>L. brevis</i>      | 0.75±0.03 Aa  | 0.69±0.06 ABa  | 0.62±0.04 Ba    | 0.68±0.06 Ba   | tr            | tr             |
|                              | <i>L. acidophilus</i> | 0.75±0.03 Ac  | 0.52±0.01 Ab   | 0.46±0.02 Aab   | 0.38±0.03 Aa   | tr            | tr             |
|                              | <i>O. oeni</i>        | 0.75±0.03 Ab  | 0.75±0.03 Bb   | 0.71±0.02 Bab   | 0.58±0.05 ABa  | tr            | tr             |
| 3-Hydroxy-cinnamic acid      | <i>L. brevis</i>      | 0.37±0.01 Ad  | 0.21±0.02 Abc  | 0.27±0.02 Ac    | 0.19±0.02 Aab  | 0.18±0.01 Aab | 0.13±0.01 Aa   |
|                              | <i>L. acidophilus</i> | 0.37±0.01 Ab  | 0.17±0.03 Aa   | 0.23±0.00 Aa    | 0.25±0.02 Aab  | 0.22±0.03 Aa  | 0.24±0.05 Aab  |
|                              | <i>O. oeni</i>        | 0.37±0.01 Ab  | 0.18±0.02 Aa   | 0.27±0.08 Aab   | 0.17±0.02 Aa   | 0.16±0.01 Aa  | 0.10±0.02 Aa   |
| Ferulic acid                 | <i>L. brevis</i>      | 0.07±0.00 Ab  | 0.03±0.01 Aa   | 0.04±0.01 ABa   | tr             | tr            | tr             |
|                              | <i>L. acidophilus</i> | 0.07±0.00 Ab  | 0.07±0.01 Bb   | 0.06±0.01 Bb    | 0.01±0.01 Aa   | tr            | tr             |
|                              | <i>O. oeni</i>        | 0.07±0.00 Ab  | 0.03±0.01 Aa   | 0.03±0.01 Aa    | tr             | tr            | tr             |



|                         |                       |               |                |                |                 |                |               |
|-------------------------|-----------------------|---------------|----------------|----------------|-----------------|----------------|---------------|
| <i>Total</i>            | <i>L. brevis</i>      | 69.25±2.08 Ab | 62.19±3.49 Bab | 57.31±1.24 Ba  | 54.33±1.33 Ba   | 52.40±2.83 Ba  | 53.56±1.02 Ca |
|                         | <i>L. acidophilus</i> | 69.25±2.08 Ad | 42.59±0.10 Ac  | 40.61±0.92 Abc | 37.43±0.65 Aab  | 33.89±0.88 Aa  | 35.52±0.29 Aa |
|                         | <i>O. oeni</i>        | 69.25±2.08 Ad | 56.10±0.95 Bc  | 55.84±1.10 Bbc | 52.31±0.32 Babc | 50.92±0.28 Bab | 50.77±0.29 Ba |
| <b><i>Flavanols</i></b> |                       |               |                |                |                 |                |               |
| Epicatechin             | <i>L. brevis</i>      | 18.6±0.94 Ac  | 18.50±0.99 Ac  | 15.59±1.20 Ac  | 9.80±0.02 Ab    | 8.08±0.25 Aab  | 6.22±0.06 Aa  |
|                         | <i>L. acidophilus</i> | 18.6±0.94 Ad  | 18.05±0.02 Acd | 15.57±1.07 Ac  | 11.99±0.13 Bb   | 8.98±0.47 Aa   | 8.49±0.09 Ba  |
|                         | <i>O. oeni</i>        | 18.6±0.94 Ad  | 16.30±0.25 Acd | 15.58±0.40 Ac  | 9.41±0.55 Ab    | 8.27±0.38 Aab  | 5.76±0.46 Aa  |
| Procyanidin B2          | <i>L. brevis</i>      | 5.85±0.15 Ad  | 4.86±0.35 Ac   | 4.44±0.20 Ac   | 2.66±0.02 Ab    | 1.89±0.21 Aab  | 1.39±0.13 ABa |
|                         | <i>L. acidophilus</i> | 5.85±0.15 Ad  | 5.03±0.05 Acd  | 4.83±0.42 Ac   | 3.13±0.10 Ab    | 2.14±0.09 Aa   | 1.98±0.02 Ba  |
|                         | <i>O. oeni</i>        | 5.85±0.15 Ad  | 4.89±0.15 Acd  | 4.53±0.12 Ac   | 2.92±0.54 Ab    | 1.94±0.09 Aab  | 1.31±0.21 Aa  |
| Epigallocatechin        | <i>L. brevis</i>      | 1.24±0.08 Ab  | 1.25±0.06 Ab   | 1.08±0.04 Ab   | 0.81±0.01 Aa    | 0.71±0.04 Aa   | 0.63±0.01 Aa  |
|                         | <i>L. acidophilus</i> | 1.24±0.08 Ac  | 1.24±0.02 Ac   | 1.13±0.05 Abc  | 1.03±0.07 Aabc  | 0.87±0.09 Aab  | 0.76±0.02 Ba  |
|                         | <i>O. oeni</i>        | 1.24±0.08 Ad  | 1.17±0.02 Ad   | 1.09±0.01 Acd  | 0.90±0.08 Abc   | 0.74±0.01 Aab  | 0.64±0.03 Aa  |
| Gallocatechin           | <i>L. brevis</i>      | 1.22±0.08 Ab  | 1.26±0.00 Ab   | 1.16±0.05 Bb   | 0.68±0.03 ABa   | 0.53±0.04 Aa   | 0.53±0.01 ABa |
|                         | <i>L. acidophilus</i> | 1.22±0.08 Ac  | 1.17±0.09 Ac   | 0.97±0.06 ABbc | 0.79±0.01 Bab   | 0.76±0.05 Bab  | 0.57±0.06 Ba  |
|                         | <i>O. oeni</i>        | 1.22±0.08 Ad  | 1.09±0.05 Ad   | 0.89±0.01 Ac   | 0.64±0.03 Ab    | 0.52±0.03 Aab  | 0.41±0.01 Aa  |
| Catechin                | <i>L. brevis</i>      | 0.94±0.04 Ad  | 0.70±0.01 Bc   | 0.69±0.06 Ac   | 0.44±0.04 Ab    | 0.34±0.01 Aab  | 0.18±0.02 Aa  |
|                         | <i>L. acidophilus</i> | 0.94±0.04 Ad  | 0.72±0.01 Bc   | 0.65±0.09 Abc  | 0.51±0.03 Ab    | 0.29±0.03 Aa   | 0.25±0.01 Aa  |
|                         | <i>O. oeni</i>        | 0.94±0.04 Ac  | 0.61±0.01 Ab   | 0.60±0.06 Ab   | 0.50±0.01 Ab    | 0.28±0.02 Aa   | 0.22±0.02 Aa  |
| Procyanidin C1          | <i>L. brevis</i>      | 0.69±0.10 Aa  | 0.59±0.31 Aa   | 0.47±0.20 Aa   | tr              | tr             | tr            |
|                         | <i>L. acidophilus</i> | 0.69±0.10 Aa  | 0.72±0.02 Aa   | 0.63±0.25 Aa   | tr              | tr             | tr            |
|                         | <i>O. oeni</i>        | 0.69±0.10 Aa  | 0.57±0.05 Aa   | 0.56±0.03 Aa   | tr              | tr             | tr            |
| Procyanidin B1          | <i>L. brevis</i>      | 0.44±0.01 Ab  | 0.27±0.01 Aa   | 0.21±0.05 Aa   | tr              | tr             | tr            |
|                         | <i>L. acidophilus</i> | 0.44±0.01 Ac  | 0.27±0.03 Ab   | 0.23±0.02 Aab  | 0.10±0.06 Aa    | tr             | tr            |
|                         | <i>O. oeni</i>        | 0.44±0.01 Ab  | 0.24±0.05 Aa   | 0.20±0.03 Aa   | tr              | tr             | tr            |
| <i>Total</i>            | <i>L. brevis</i>      | 28.97±1.03 Ad | 27.42±1.74 Acd | 23.63±1.70 Ac  | 14.40±0.07 Ab   | 11.55±0.32 Aab | 8.95±0.19 Aa  |
|                         | <i>L. acidophilus</i> | 28.97±1.03 Ad | 27.21±0.02 Acd | 24.01±1.91 Ac  | 17.55±0.27 Bb   | 13.04±0.60 Aa  | 12.05±0.15 Ba |

|                            |                       |               |                 |                |                |                |                 |
|----------------------------|-----------------------|---------------|-----------------|----------------|----------------|----------------|-----------------|
|                            | <i>O. oeni</i>        | 28.97±1.03 Ad | 24.87±0.50 Ac   | 23.43±0.48 Ac  | 14.38±1.00 Ab  | 11.74±0.52 Aab | 8.34±0.69 Aa    |
| <b><i>Flavonols</i></b>    |                       |               |                 |                |                |                |                 |
| Myricetin-3-O-galactoside  | <i>L. brevis</i>      | 93.47±4.03 Ab | 78.90±3.87 ABab | 79.42±1.76 Aab | 76.11±2.74 ABa | 72.70±4.15 Aa  | 74.00±1.01 Aa   |
|                            | <i>L. acidophilus</i> | 93.47±4.03 Ab | 84.55±0.44 Bab  | 82.26±2.00 Aa  | 80.97±0.92 Ba  | 79.86±2.71 Aa  | 73.93±1.54 Aa   |
|                            | <i>O. oeni</i>        | 93.47±4.03 Ab | 73.09±1.79 Aa   | 75.31±0.94 Aa  | 72.48±0.74 Aa  | 72.58±0.66 Aa  | 68.94±1.37 Aa   |
| Quercetin-3-O-galactoside  | <i>L. brevis</i>      | 54.78±0.22 Ac | 45.88±2.37 Ab   | 42.97±0.80 Aab | 41.17±1.33 Aab | 39.21±2.15 Aab | 38.70±0.65 Ba   |
|                            | <i>L. acidophilus</i> | 54.78±0.22 Ad | 47.05±0.13 Ac   | 44.66±1.46 Abc | 43.38±0.84 Abc | 42.49±1.14 Aab | 39.04±0.78 Ba   |
|                            | <i>O. oeni</i>        | 54.78±0.22 Ac | 40.76±1.24 Ab   | 40.79±0.23 Ab  | 39.61±0.42 Ab  | 39.04±0.32 Ab  | 35.81±0.41 Aa   |
| Quercetin                  | <i>L. brevis</i>      | 33.16±1.63 Ab | 22.97±2.08 Aa   | 22.53±1.09 Ba  | 17.27±1.73 Aa  | 16.34±1.93 Aa  | 18.66±0.30 Ba   |
|                            | <i>L. acidophilus</i> | 33.16±1.63 Ad | 26.10±0.88 Ac   | 24.66±1.03 Bbc | 18.25±2.54 Aab | 18.46±0.19 Aab | 12.56±0.30 Aa   |
|                            | <i>O. oeni</i>        | 33.16±1.63 Ac | 20.62±1.06 Ab   | 16.08±1.39 Aab | 12.88±1.43 Aa  | 16.43±0.79 Aab | 15.89±1.33 ABab |
| Quercetin-3-O-glucuronide  | <i>L. brevis</i>      | 26.21±0.57 Aa | 24.55±3.07 Aa   | 24.00±2.08 Aa  | 25.69±1.50 Ba  | 24.34±1.11 Ba  | 22.15±1.98 Aa   |
|                            | <i>L. acidophilus</i> | 26.21±0.57 Ac | 21.81±0.16 Ab   | 21.44±0.77 Ab  | 20.59±0.58 Aab | 20.32±0.70 Aab | 18.71±0.23 Aa   |
|                            | <i>O. oeni</i>        | 26.21±0.57 Ab | 18.25±0.66 Aa   | 18.75±0.42 Aa  | 17.23±0.56 Aa  | 18.62±0.45 Aa  | 17.33±0.24 Aa   |
| Syringetin-3-O-galactoside | <i>L. brevis</i>      | 13.69±0.27 Ab | 11.54±0.63 Aa   | 10.71±0.21 Aa  | 10.74±0.39 Aa  | 10.26±0.63 Aa  | 10.04±0.13 ABa  |
|                            | <i>L. acidophilus</i> | 13.69±0.27 Ac | 11.71±0.14 Ab   | 11.22±0.39 Aab | 11.12±0.14 Aab | 10.7±0.23 Aab  | 10.49±0.21 Ba   |
|                            | <i>O. oeni</i>        | 13.69±0.27 Ac | 10.63±0.31 Ab   | 10.53±0.10 Aab | 10.06±0.10 Aab | 9.67±0.14 Aa   | 9.73±0.13 Aab   |
| Myricetin                  | <i>L. brevis</i>      | 7.89±0.68 Ab  | 6.21±0.62 Aab   | 6.10±0.28 ABab | 5.11±0.44 Aa   | 5.44±0.01 Ba   | 5.35±0.12 Aa    |
|                            | <i>L. acidophilus</i> | 7.89±0.68 Ac  | 6.84±0.11 Abc   | 6.81±0.31 Bbc  | 5.56±0.44 Aab  | 5.50±0.12 Bab  | 4.33±0.42 Aa    |
|                            | <i>O. oeni</i>        | 7.89±0.68 Ab  | 5.11±0.51 Aa    | 4.98±0.18 Aa   | 4.30±0.29 Aa   | 5.03±0.03 Aa   | 4.62±0.25 Aa    |
| Myricetin-3-O-glucoside    | <i>L. brevis</i>      | 3.91±0.01 Aab | 4.27±0.25 ABb   | 3.81±0.02 Bab  | 3.43±0.21 Aab  | 3.18±0.29 Aa   | 3.10±0.12 Aa    |

|                 |                       |                |                 |                 |                  |                 |                 |
|-----------------|-----------------------|----------------|-----------------|-----------------|------------------|-----------------|-----------------|
|                 | <i>L. acidophilus</i> | 3.91±0.01 Ac   | 4.50±0.14 Bd    | 3.74±0.14 Bc    | 3.46±0.09 Abc    | 3.15±0.20 Aab   | 2.72±0.04 Aa    |
|                 | <i>O. oeni</i>        | 3.91±0.01 Ac   | 3.48±0.12 Abc   | 3.18±0.13 Aab   | 2.85±0.17 Aa     | 3.33±0.16 Aabc  | 2.82±0.11 Aa    |
| Isorhamnetin-3- | <i>L. brevis</i>      | 3.74±0.13 Ad   | 3.31±0.14 ABcd  | 3.14±0.03 Abc   | 2.94±0.10 Aabc   | 2.70±0.20 Aab   | 2.57±0.05 Aa    |
| O-glucoside     | <i>L. acidophilus</i> | 3.74±0.13 Ad   | 3.52±0.03 Bcd   | 3.22±0.12 Abc   | 3.04±0.08 Ab     | 2.86±0.05 Aab   | 2.61±0.09 Aa    |
|                 | <i>O. oeni</i>        | 3.74±0.13 Ad   | 2.97±0.12 Ac    | 2.98±0.01 Ac    | 2.75±0.02 Abc    | 2.54±0.06 Aab   | 2.38±0.04 Aa    |
| Syringetin-3-O- | <i>L. brevis</i>      | 3.52±0.03 Ab   | 3.22±0.20 Aab   | 3.21±0.02 Bab   | 2.90±0.16 Aab    | 2.61±0.21 Aa    | 2.59±0.06 Aa    |
| glucoside       | <i>L. acidophilus</i> | 3.52±0.03 Ab   | 3.33±0.03 Ab    | 2.87±0.08 Aa    | 2.97±0.09 Aa     | 2.92±0.04 Aa    | 2.82±0.04 Ba    |
|                 | <i>O. oeni</i>        | 3.52±0.03 Ac   | 2.95±0.04 Ab    | 2.74±0.07 Aab   | 2.65±0.09 Aa     | 2.61±0.08 Aa    | 2.57±0.02 Aa    |
| Laricitrin      | <i>L. brevis</i>      | 1.60±0.20 Ab   | 1.18±0.17 Aab   | 1.20±0.05 Bab   | 0.88±0.11 Aa     | 0.88±0.03 Aa    | 0.97±0.05 Aa    |
|                 | <i>L. acidophilus</i> | 1.60±0.20 Ac   | 1.39±0.03 Abc   | 1.31±0.11 Bbc   | 1.01±0.14 Aab    | 0.93±0.03 Aab   | 0.70±0.10 Aa    |
|                 | <i>O. oeni</i>        | 1.60±0.20 Ab   | 1.10±0.05 Aa    | 0.86±0.06 Aa    | 0.68±0.03 Aa     | 0.84±0.04 Aa    | 0.75±0.08 Aa    |
| Dihydroquerceti | <i>L. brevis</i>      | 1.54±0.02 Ad   | 0.83±0.04 Ac    | 0.76±0.03 Ac    | 0.41±0.01 Ab     | 0.39±0.04 Bab   | 0.24±0.03 Ba    |
| n               | <i>L. acidophilus</i> | 1.54±0.02 Ad   | 0.80±0.02 Ac    | 0.73±0.09 Ac    | 0.41±0.10 Ab     | 0.12±0.02 Aa    | 0.10±0.02 Aa    |
|                 | <i>O. oeni</i>        | 1.54±0.02 Ac   | 0.69±0.08 Ab    | 0.66±0.03 Ab    | 0.37±0.05 Aa     | 0.34±0.02 Ba    | 0.19±0.00 ABa   |
| Isorhamnetin    | <i>L. brevis</i>      | 1.42±0.16 Ab   | 1.19±0.06 Aab   | 1.20±0.01 Bab   | 0.96±0.08 Aa     | 0.90±0.07 Aa    | 0.97±0.01 Aa    |
|                 | <i>L. acidophilus</i> | 1.42±0.16 Ac   | 1.31±0.04 Abc   | 1.17±0.02 Babc  | 1.01±0.09 Aab    | 1.03±0.01 Aab   | 0.85±0.03 Aa    |
|                 | <i>O. oeni</i>        | 1.42±0.16 Ab   | 1.01±0.13 Aab   | 0.91±0.05 Aa    | 0.70±0.03 Aa     | 0.95±0.02 Aa    | 0.90±0.05 Aa    |
| Total           | <i>L. brevis</i>      | 244.93±5.76 Ab | 204.05±13.49 Aa | 199.05±6.32 ABa | 187.61±7.68 Aa   | 178.94±9.86 Aa  | 179.33±4.12 Ba  |
|                 | <i>L. acidophilus</i> | 244.93±5.76 Ad | 212.92±1.44 Ac  | 204.07±6.38 Bbc | 191.77±5.83 Aabc | 188.35±5.21 Aab | 168.87±2.34 ABa |
|                 | <i>O. oeni</i>        | 244.93±5.76 Ac | 180.68±5.29 Ab  | 177.76±2.71 Aab | 166.58±2.77 Aab  | 172.00±1.46 Aab | 161.93±3.04 Aa  |

Data are mean ± standard deviation of triplicate tests; Different letters in lower case indicate significant differences with time, whereas different letters in upper case represent significant difference in juice inoculated with different strains at the same sampling interval at  $P < 0.05$
